# Supplementary material
Source: PubMed Central journal article supplement (PMC3208077)
Supplement: NIHMS309569-supplement-01.pdf [file NIHMS309569-supplement-01.pdf]

Figure 3a.

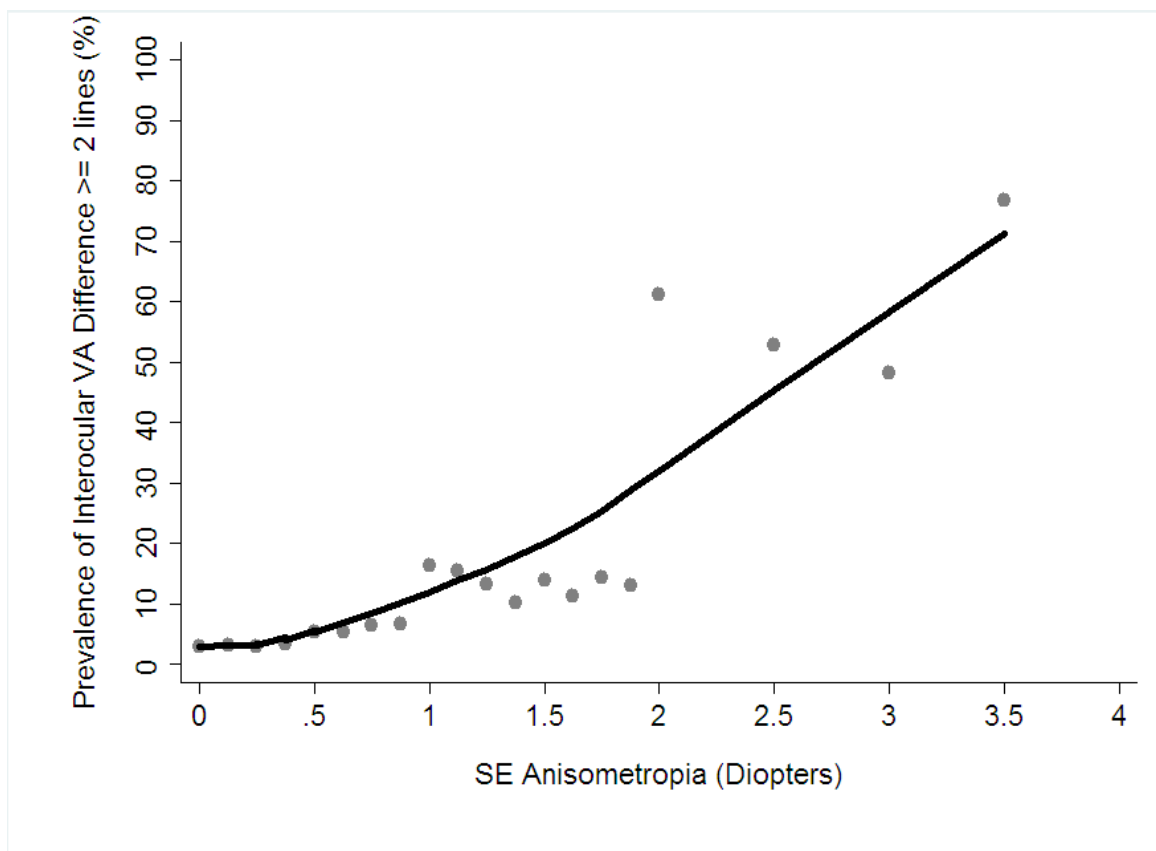

Figure 3b.

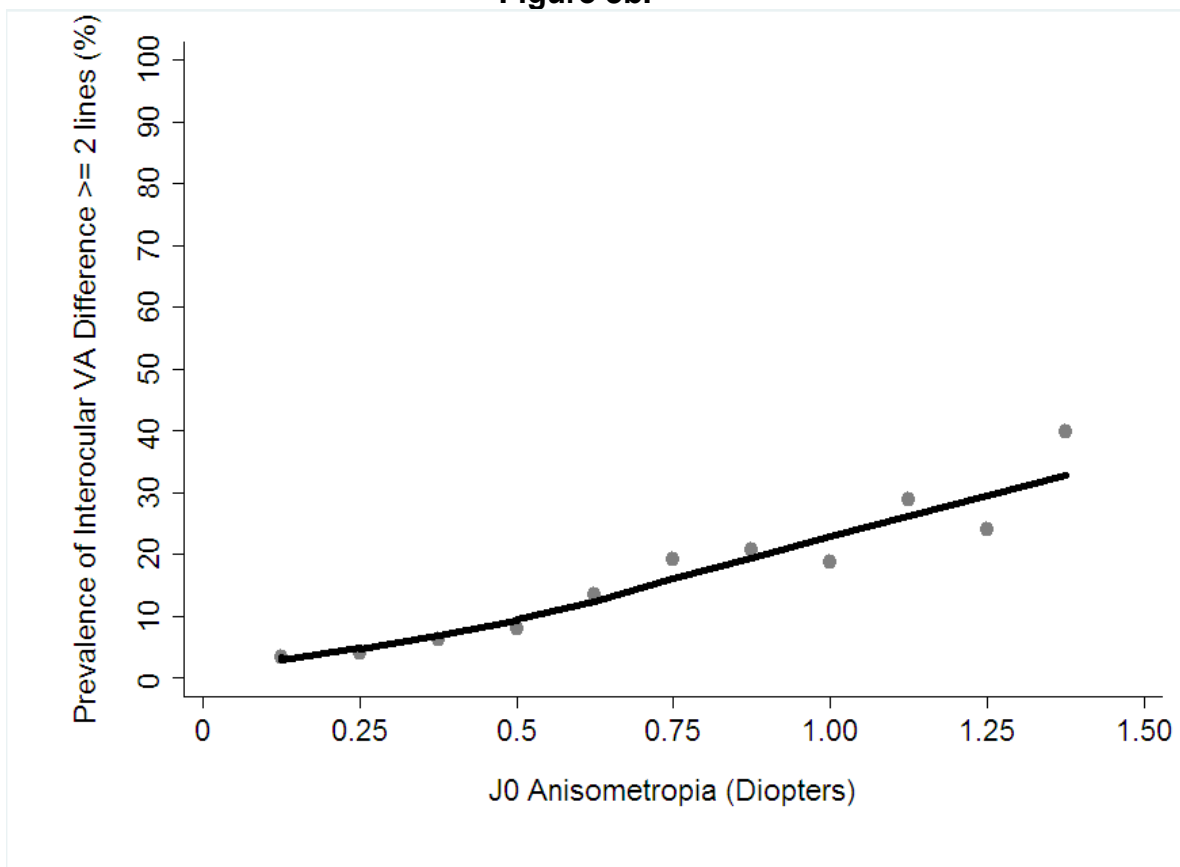

**Figure 3c.**

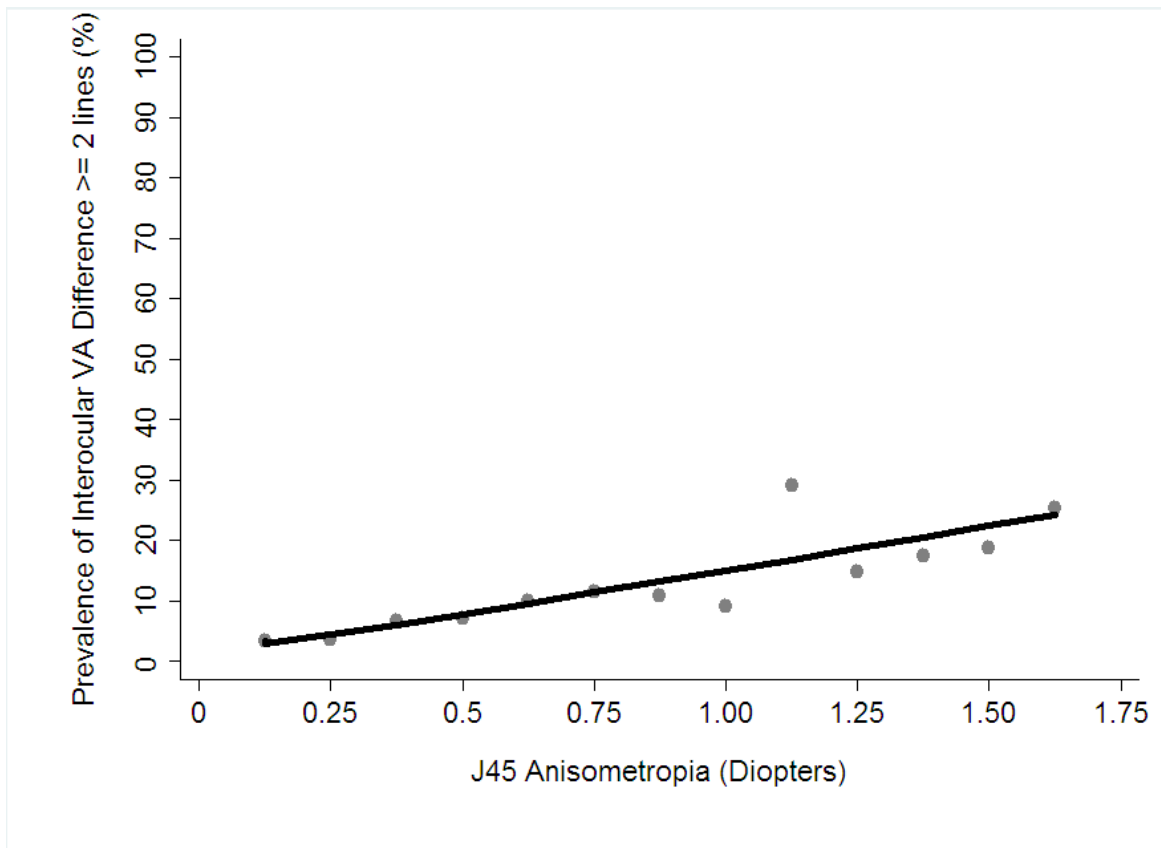

Figure 3: ONLINE SUPPLEMENTAL MATERIAL ONLY (A) Locally weighted regression lines illustrating the independent relationship between level of spherical equivalent anisometropia ; (B) anisometropia in the J0 (cartesian) vector component of astigmatism ; and (C) anisometropia in the J45 (oblique) vector component of astigmatism, and the estimated prevalence of inter-ocular visual acuity (VA) difference of 2 or more lines with VA 20/32 or worse in the worse eye, in preschool children in the Multi-Ethnic Pediatric Eye Disease Study (MEPEDS) and the Baltimore Pediatric Eye Disease Study (BPEDS), after controlling for other risk factors. The estimated prevalence of having an inter-ocular VA difference of 2 or more lines with VA 20/32 or worse in the worse eye was obtained using the stepwise logistic regression procedure. VA: visual acuity. SE: spherical equivalent. J0: J0 (Cartesian) power vector component of astigmatism. J45: J45 (oblique) power vector component of astigmatism.
